# Supplementary material for: Ce:(Lu,Sr)3(Al,Si)5O12 transparent ceramics for high-power white LEDs/LDs with ultra-high luminance saturation threshold
Source: Royal Society of Chemistry journal article supplement (doi:10.1039/d4tc00648h), 2024-01-01
Supplement: d4tc00648h1.pdf [file d4tc00648h1.pdf]

## Supporting Information

### **Ce:(Lu,Sr)<sub>3</sub>(Al,Si)<sub>5</sub>O<sub>12</sub> transparent ceramics for high-power white LEDs/LDs with ultra-high luminance saturation threshold**

Xiyue Zhang,<sup>a</sup> Pengfei Sang,<sup>a</sup> Cong Wei,<sup>a</sup> Shenghui Lin,<sup>a</sup> Jian Kang,<sup>b</sup> Yanbin Li,<sup>a,b\*</sup>  
Bingheng Sun,<sup>c</sup> Yang Li,<sup>d</sup> Farida A Selim,<sup>e</sup> Chunming Zhou,<sup>a</sup> Tianyuan Zhou,<sup>a</sup>  
Shiwei Chen,<sup>f</sup> Chaofan Shi,<sup>b</sup> Wieslaw Stręka,<sup>g</sup> Hao Chen,<sup>a,b\*</sup> and Le Zhang<sup>a,b,h\*</sup>

<sup>a</sup> Jiangsu Key Laboratory of Advanced Laser Materials and Devices, School of Physics and Electronics Engineering, Jiangsu Normal University, Xuzhou, 221116, P.R. China

<sup>b</sup> Jiangsu Xiyi Advanced Materials Research Institute of Industrial Technology, Xuzhou, 221400, P.R. China

<sup>c</sup> Shanghai Institute of Optics Fine Mechanics, Chinese Academy of Sciences, Shanghai, 201800, P.R. China

<sup>d</sup> School of Material Science and Engineering, Shanghai Institute of Technology, Shanghai, 201418, P.R. China

<sup>e</sup> Department of Physics and Astronomy, Bowling Green State University, Bowling Green, 43403, USA

<sup>f</sup> Xuzhou Kangna Advanced Materials Technology Co., Ltd, Xuzhou, 221400, P.R. China

<sup>g</sup> Institute of Low Temperature and Structure Research, Polish Academy of Sciences, Wrocław, 50-422, Poland

<sup>h</sup> State Key Laboratory of Crystal Materials, Shandong University, Jinan 250100, PR China

\* *To whom correspondence should be addressed.*

*E-mail: [zhangle@jsnu.edu.cn](mailto:zhangle@jsnu.edu.cn)(Le Zhang); [chenhao@jsnu.edu.cn](mailto:chenhao@jsnu.edu.cn)(Hao Chen); [lyb@jsnu.edu.cn](mailto:lyb@jsnu.edu.cn)  
(Yanbin Li)*

Table S1. Reports on commercial green phosphor material

| Components                                                                                                | Color convertor | Central wavelength h | Luminous efficiency(excited by LD) | Saturation threshold      | Year | Reference |
|-----------------------------------------------------------------------------------------------------------|-----------------|----------------------|------------------------------------|---------------------------|------|-----------|
| LuAG:Ce                                                                                                   | PC              | 520 nm               | 216.9 lm/W                         | >19.75 W mm <sup>-2</sup> | 2021 | 1         |
| LuAG:Ce/Al <sub>2</sub> O <sub>3</sub>                                                                    | PC              | 510nm                | 283lm/W                            | >20.5 W mm <sup>-2</sup>  | 2023 | 2         |
| Ba <sub>1.5</sub> Lu <sub>1.5</sub> Al <sub>3.5</sub> Si <sub>1.5</sub> O <sub>12</sub> :Ce <sup>3+</sup> | PC              | 520 nm               | /                                  | /                         | 2020 | 3         |
| YLuAG:Ce                                                                                                  | PC              | 519 nm               | 148 lm/W                           | /                         | 2021 | 4         |
| YAGG:Ce <sup>3+</sup>                                                                                     | PIG             | 520nm                | /                                  | /                         | 2021 | 5         |
| LuAG:Ce-PiSG                                                                                              | PIG             | 510nm                | /                                  | 13.4 W mm <sup>-2</sup>   | 2022 | 6         |
| β-Sialon:Eu <sup>2+</sup>                                                                                 | PIG             | 540 nm               | 154 lm/W                           | 2.7 W mm <sup>-2</sup>    | 2021 | 7         |
| LuAG:Ce                                                                                                   | PIG             | 520 nm               | 225 lm/W                           | 4.3 W mm <sup>-2</sup>    | 2021 | 8         |
| LuAG:Ce                                                                                                   | PIF             | 520nm                | /                                  | 21 W mm <sup>-2</sup>     | 2022 | 9         |
| β-Sialon:Eu <sup>2+</sup>                                                                                 | PIF             | 520nm                | /                                  | 15.49 W mm <sup>-2</sup>  | 2022 | 10        |
| YAGG:Ce <sup>3+</sup>                                                                                     | PIF             | 530 nm               | 230 lm/W                           | 39 W mm <sup>-2</sup>     | 2019 | 11        |
| γ-AlON: Mn <sup>2+</sup> ,Mg <sup>2+</sup>                                                                | phosphor        | 510 nm               | /                                  | /                         | 2019 | 12        |
| CaY <sub>2</sub> ZrGaAl <sub>3</sub> O <sub>12</sub> :Ce <sup>3+</sup>                                    | phosphor        | 514 nm               | /                                  | /                         | 2023 | 13        |
| Sr[Be <sub>6</sub> ON <sub>4</sub> ]:Eu <sup>2+</sup>                                                     | phosphor        | 500 nm               | /                                  | /                         | 2018 | 14        |
| Ba <sub>9</sub> Sc <sub>2</sub> Si <sub>6</sub> O <sub>24</sub> :Eu <sup>2+</sup>                         | phosphor        | 508 nm               | /                                  | /                         | 2009 | 15        |

\* PC: phosphor ceramic, PIG: phosphor-in-glass, PIF: phosphor-in-glass film

- H. Ding, Z. Liu, P. Hu, Y. Liu, P. Sun, Z. Luo, X. Chen, H. Jiang and J. Jiang, *Advanced Optical Materials*, 2021, **9**, 2002141.
- Cheng Z, Liu X, Chen X, Xu J, Wang Y, Xie T, Wu L, Dai Z, Zhou G, Zou J, Li J, *Journal of Advanced Ceramics*, 2023, **12**, 625.
- X. Li, C. Guo, H. Wang, Y. Chen, J. Zhou, J. Lin and Q. Zeng, *Ceramics International*, 2020, **46**, 5863.
- J. Ling, W.-T. Xu, J. Yang, T. Mu, Y. Zhang, Y. Zhou and M. Hong, *Journal of the European Ceramic Society*, 2021, **41**, 5967.
- Peng Y, Sun Q, Liu J, Cheng H, Mou Y, *Journal of Alloys and Compounds*, 2021, **850**, 156811.
- Li Q, Xiao W, Zhang D, Wang D, Zheng G, Qiu J, *Laser & Photonics Reviews*, 2022, **16**, 2200553.
- F. Xu, H. Yang, Y. Zhang, X. Liu, Y. Zhang, L. Wang, Z. Wang, X. Liang, P. Qian and W. Xiang, *Journal of Alloys and Compounds*, 2021, **887**, 161301.
- L. Wang, H. Yang, Y. Zhang, Y. Liang, J. Zhang, E. Mei, F. Xu, J. Long, P. Yu and W. Xiang, *Journal of Alloys and Compounds*, 2022, **892**, 161882.
- Huang Q, Sui P, Huang F, Lin H, Wang B, Lin S, Wang P, Xu J, Cheng Y, Wang Y, *Laser & Photonics Reviews*, 2022, **16**, 2200040.
- Chen H, Lin T, Huang F, Li S, Tang X, Xie R-J, *Advanced Optical Materials*, 2022, **10**, 2200836.
- J. Liu, L. Wang, S. Bao, L. Xu, Y. Wang, Q. Wen, J. Zheng, X. Liang, J. Kang and W. Xiang, *Ceramics International*, 2023, **49**, 18836.
- Q. Dong, F. Yang, J. Cui, Y. Tian, S. Liu, F. Du, J. Peng and X. Ye, *Ceramics International*, 2019, **45**, 11868.
- L. Cao, Z. Xu, J. Chan, B. Devakumar and X. Huang, *Journal of Luminescence*, 2023, **263**, 120015.
- P. Strobel, T. de Boer, V. Weiler, P. J. Schmidt, A. Moewes and W. Schnick, *Chemistry of Materials*, 2018, **30**, 3122.

15. T. Nakano, Y. Kawakami, K. Uematsu, T. Ishigaki, K. Toda and M. Sato, *Journal of Luminescence*, 2009, **129**, 1654.

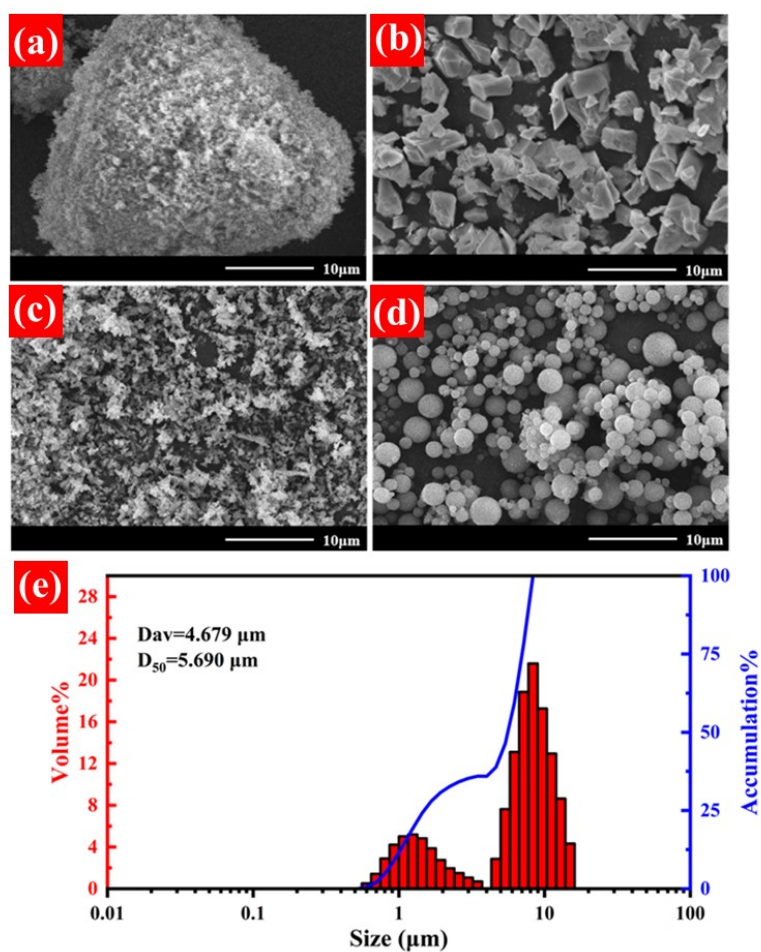

Fig. S1 SEM images of raw material powders: (a)  $\text{Al}_2\text{O}_3$ , (b)  $\text{Lu}_2\text{O}_3$ , (c)  $\text{SrCO}_3$ , (d)  $\text{SiO}_2$ . (e) Particle size distribution of Sr05 precursor powders

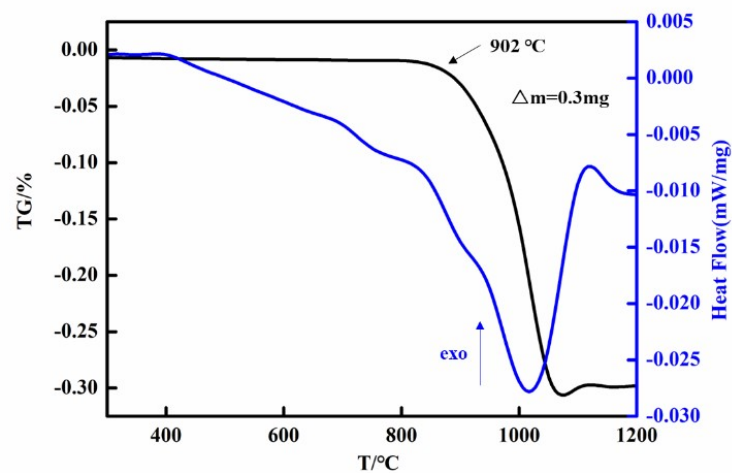

Fig. S2 TG/DSC curves of  $\text{SrCO}_3$  powders

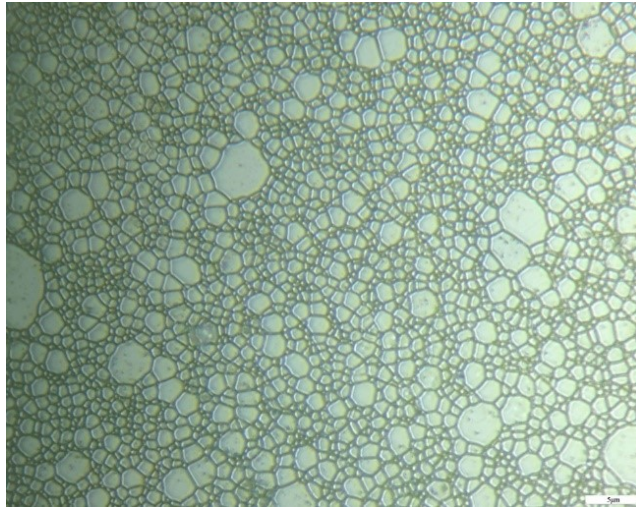

Fig. S3 Optical microscope image of Sr05 TC

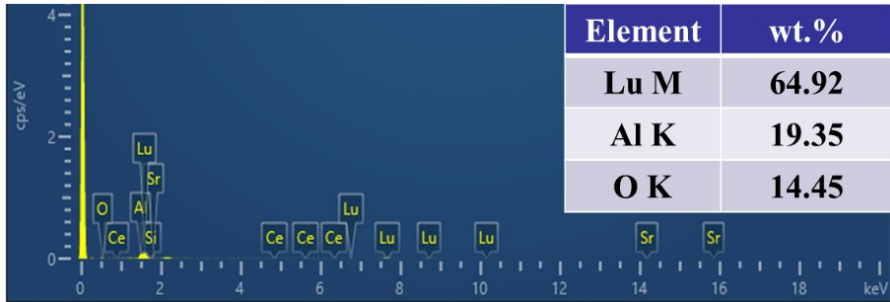

Fig. S4 EDS elemental mapping images of Sr05 TC

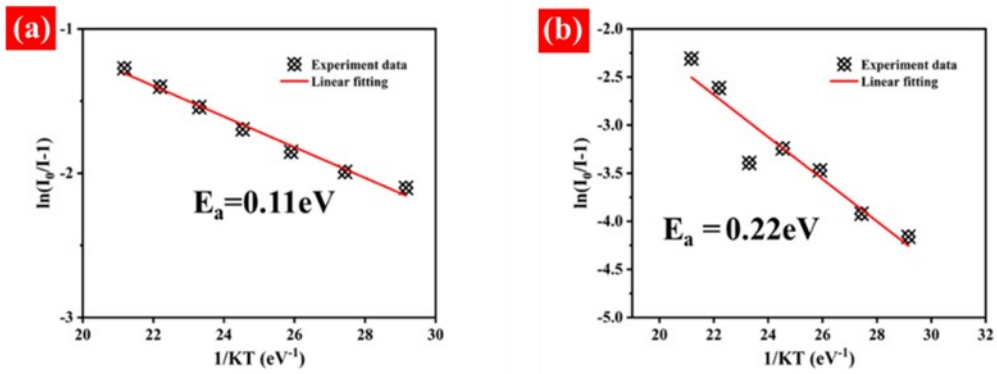

Fig. S5 The emission intensity and temperature Arrhenius fitting of (a) Sr00 and (b) Sr05 TC

$$I(T) = \frac{I_0}{1 + C \exp\left(\frac{-\Delta E}{KT}\right)} \quad \text{Eq.S1}$$

where  $I_0$  and  $I_T$  represent the emission intensity at room temperature (RT) and operating temperature respectively,  $C$  is a constant and  $K$  is boltzmann constant ( $8.617 \times 10^{-5}$  eV/K).

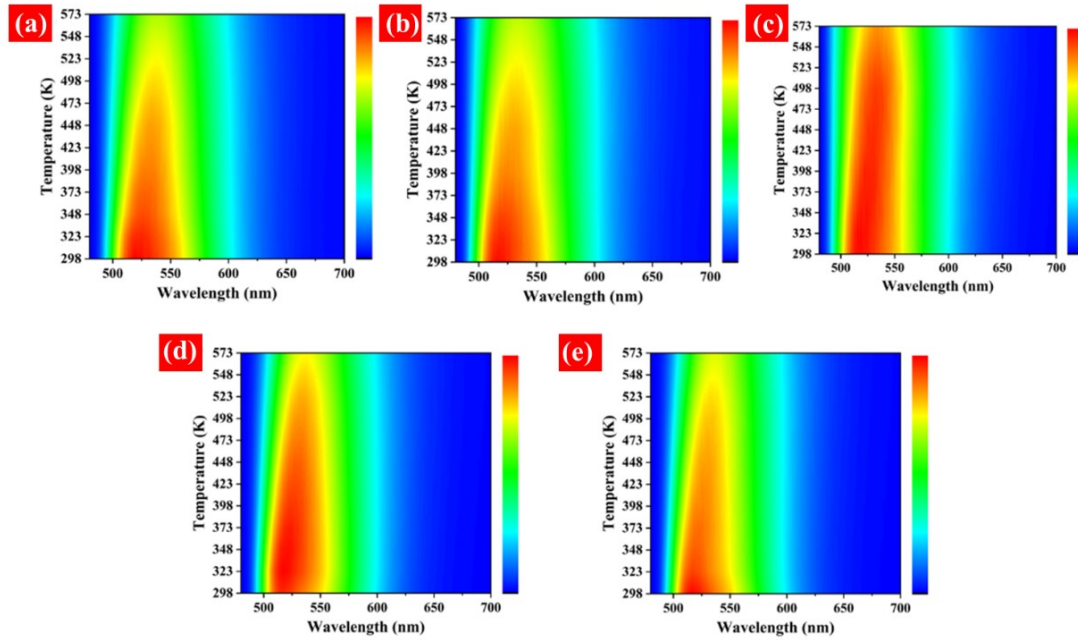

Fig. S6 Temperature-dependent PL spectra of (a) Sr00, (b) Sr025, (c) Sr05, (d) Sr075, (e) Sr10 TC under 460 nm excitation in the temperature range of 298-573 K

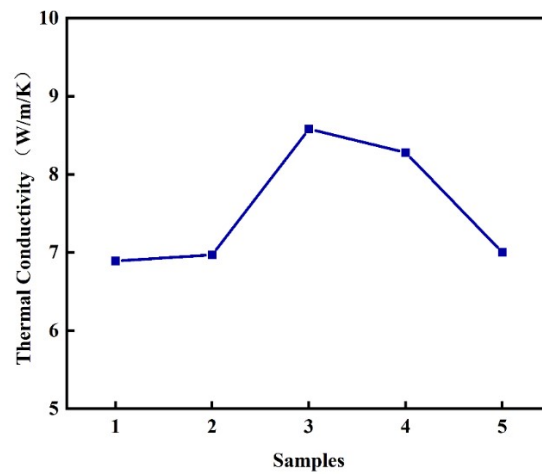

Fig. S7 Thermal conductivities of the Ce:LSASG at 50 °C

Table S2 The detailed CCT and CRI values of Ce: LSASG TCs

| Sample | CRI  | CCT  |
|--------|------|------|
| Sr00   | 48.5 | 5297 |
| Sr025  | 47.7 | 5297 |
| Sr05   | 48.1 | 5260 |
| Sr075  | 47.3 | 5297 |
| Sr10   | 46.1 | 5550 |

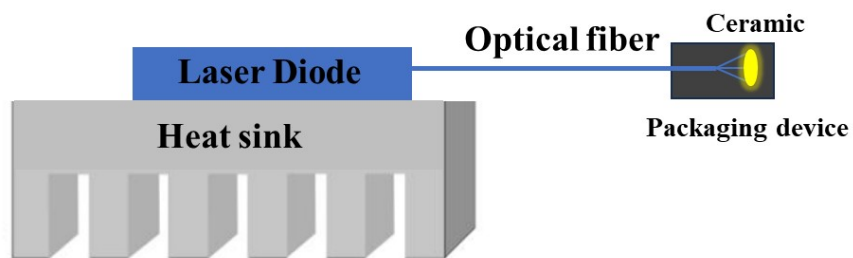

Fig. S8 A schematic of the designed white LD device

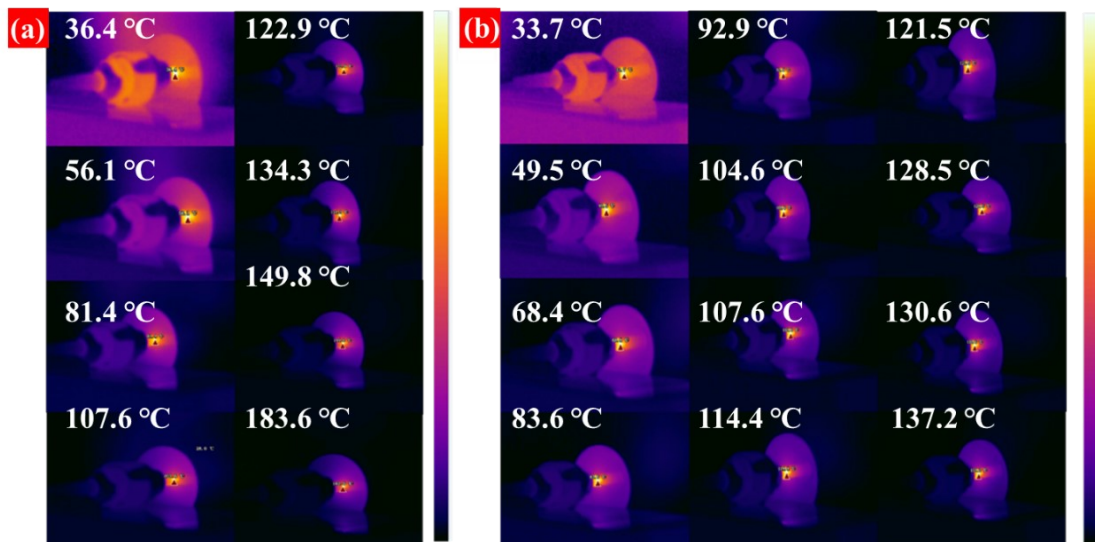

Fig. S9 Infrared thermal images and surface temperatures of (a) Sr05 and (b) Sr10 TC based LDs

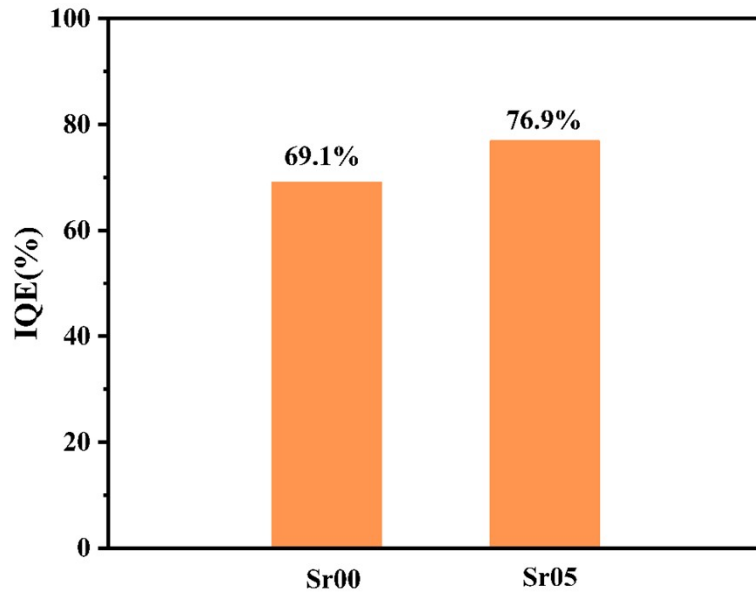

Fig.S10 IQE of Sr00 and Sr05 TCs

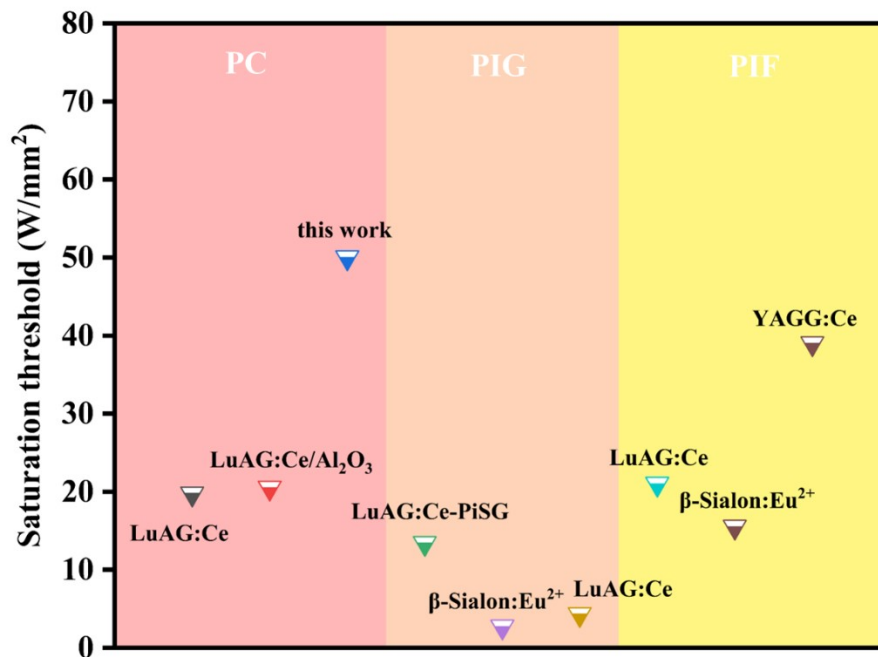

Fig. S11 The summarize of reported Saturation threshold of white LD source based on single structured phosphor ceramics
